# Supplementary material
Source: MDPI journal article supplement (https://www.mdpi.com/2297-8739/8/10/171)
Supplement: s1 [file s1]

**Table S1.** Descriptive statistics for TNE ( $\mu\text{mol}/24\text{ h urine}$ ) of six different user groups on Day 3.

|               | TNE ( $\mu\text{mol}/24\text{ h urine}$ ) |                  |                  |                  |                  |                    |
|---------------|-------------------------------------------|------------------|------------------|------------------|------------------|--------------------|
|               | CC                                        | HTP              | OT               | EC               | NRT              | NU                 |
| Mean $\pm$ SD | 105.1 $\pm$ 60.1                          | 77.24 $\pm$ 42.2 | 143.1 $\pm$ 91.4 | 42.04 $\pm$ 30.8 | 41.88 $\pm$ 42.8 | 0.5911 $\pm$ 0.535 |
| Median        | 67.97                                     | 85.90            | 145.1            | 34.92            | 20.92            | 0.3900             |
| Min–max       | 58.63–208.7                               | 10.61–128.3      | 27.91–328.9      | 19.06–122.6      | 10.10–146.5      | 0.1937–1.752       |

**Table S2.** Descriptive statistics for urinary 3-OH-BaP excretion ( $\text{pg/g creatinine}$ ) of six different user groups on Day 3.

|               | 3-OH-BaP ( $\text{pg/g creatinine 24 h}$ ) |                  |                  |                  |                  |                  |
|---------------|--------------------------------------------|------------------|------------------|------------------|------------------|------------------|
|               | CC                                         | HTP              | OT               | EC               | NRT              | NU               |
| Mean $\pm$ SD | 225.9 $\pm$ 117                            | 102.2 $\pm$ 58.2 | 80.48 $\pm$ 37.6 | 111.1 $\pm$ 81.6 | 94.98 $\pm$ 43.2 | 90.73 $\pm$ 47.5 |
| Median        | 206.0                                      | 91.50            | 63.50            | 95.75            | 70.95            | 86.70            |
| Min–max       | 81.20–431.9                                | 28.60–200.9      | 48.90–147.2      | 27.30–258.6      | 60.20–181.9      | 38.20–169.3      |

**Table S3.** Descriptive statistics for urinary 3-OH-BaP excretion ( $\text{pg}/12\text{ h urine}$ ) of six different user groups on Day -1.

|               | 3-OH-BaP ( $\text{pg}/12\text{ h urine}$ ) |                  |                  |                  |                  |                  |
|---------------|--------------------------------------------|------------------|------------------|------------------|------------------|------------------|
|               | CC                                         | HTP              | OT               | EC               | NRT              | NU               |
| Mean $\pm$ SD | 202.1 $\pm$ 270                            | 28.72 $\pm$ 15.9 | 31.15 $\pm$ 16.0 | 15.67 $\pm$ 7.88 | 48.00 $\pm$ 60.5 | 32.97 $\pm$ 26.5 |
| Median        | 144.7                                      | 26.22            | 29.56            | 14.08            | 26.49            | 22.33            |
| Min–max       | 15.73–940.6                                | 8.100–59.92      | 10.86–61.23      | 5.640–30.76      | 9.690–215.9      | 9.390–80.14      |
